# Supplementary material for: The Effect of Vitamin D3 Supplementation on Physical Capacity among Active College-Aged Males
Source: PubMed Central journal article supplement (PMC7400321; doi:10.3390/nu12071936), 2020-06-30
Supplement: nutrients-12-01936-s001.pdf [file nutrients-12-01936-s001.pdf]

Supplementary material

Table 1. The effect of Vitamin D supplementation on aerobic and anaerobic capacity.

| Variables                                              | PLA          |                         | SUP                     |                           |
|--------------------------------------------------------|--------------|-------------------------|-------------------------|---------------------------|
|                                                        | Pre          | Post                    | Pre                     | Post                      |
| 25-OH-D <sub>3</sub> [ng*ml <sup>-1</sup> ]            | 20.7 ± 6.8   | 21.2 ± 4.7              | 19.6 ± 5.4              | 58.4 ± 7.3 <sup>ab</sup>  |
| 25-OH-D <sub>3</sub><br>delta[ng*ml <sup>-1</sup> ]    | 0.5 ± 5.4    |                         | 38.8 ± 9.4 <sup>b</sup> |                           |
| VO <sub>2max</sub> [ml*min*kg <sup>-1</sup> ]          | 50.8 ± 9.5   | 46.1 ± 7.6 <sup>a</sup> | 48.1 ± 6.4              | 48.9 ± 6.3                |
| VO <sub>2max</sub> delta<br>[ml*min*kg <sup>-1</sup> ] | -4.71 ± 5.8  |                         | 0.71 ± 6.3 <sup>b</sup> |                           |
| VE <sub>max</sub> [l*min <sup>-1</sup> ]               | 131.9 ± 29.6 | 137.0 ± 28.5            | 133.3 ± 21.1            | 154.6 ± 18.4 <sup>a</sup> |
| BF <sub>max</sub> [1*min <sup>-1</sup> ]               | 49.7 ± 9.9   | 50.6 ± 8.8              | 51.7 ± 5.8              | 57.7 ± 9.1 <sup>a</sup>   |
| MAP [W]                                                | 263.9 ± 46.2 | 273.2 ± 45.7            | 257.1 ± 28.4            | 277.8 ± 33.5 <sup>a</sup> |
| MANP [W*kg <sup>-1</sup> ]                             | 10.3 ± 0.7   | 10.7 ± 0.8              | 9.9 ± 0.9               | 10.7 ± 0.9 <sup>a</sup>   |
| Work output [J*kg <sup>-1</sup> ]                      | 246.9 ± 18.7 | 254.3 ± 17.6            | 239.6 ± 17.4            | 252.8 ± 17.7 <sup>a</sup> |

PLA: placebo group; SUP: supplemented group; values are mean ± SD expressed in absolute or relative values; 25-OH-D<sub>3</sub>: 25-hydroxyvitamin D; VO<sub>2max</sub>: maximal oxygen uptake; VE<sub>max</sub>: maximal lung minute ventilation; BF<sub>max</sub>: maximal breath frequency; MAP: maximal aerobic power; MANP: maximal anaerobic power.

a significant differences from pre-treatment.

b significant differences between groups.
